# Supplementary material for: Trial to evaluate the immunogenicity and safety of a melanoma helper peptide vaccine plus incomplete Freund’s adjuvant, cyclophosphamide, and polyICLC (Mel63)
Source: HighWire-hosted journal article supplement (doi:10.1136/jitc-2020-000934), 2021-01-01

## CONSORT FLOW DIAGRAM

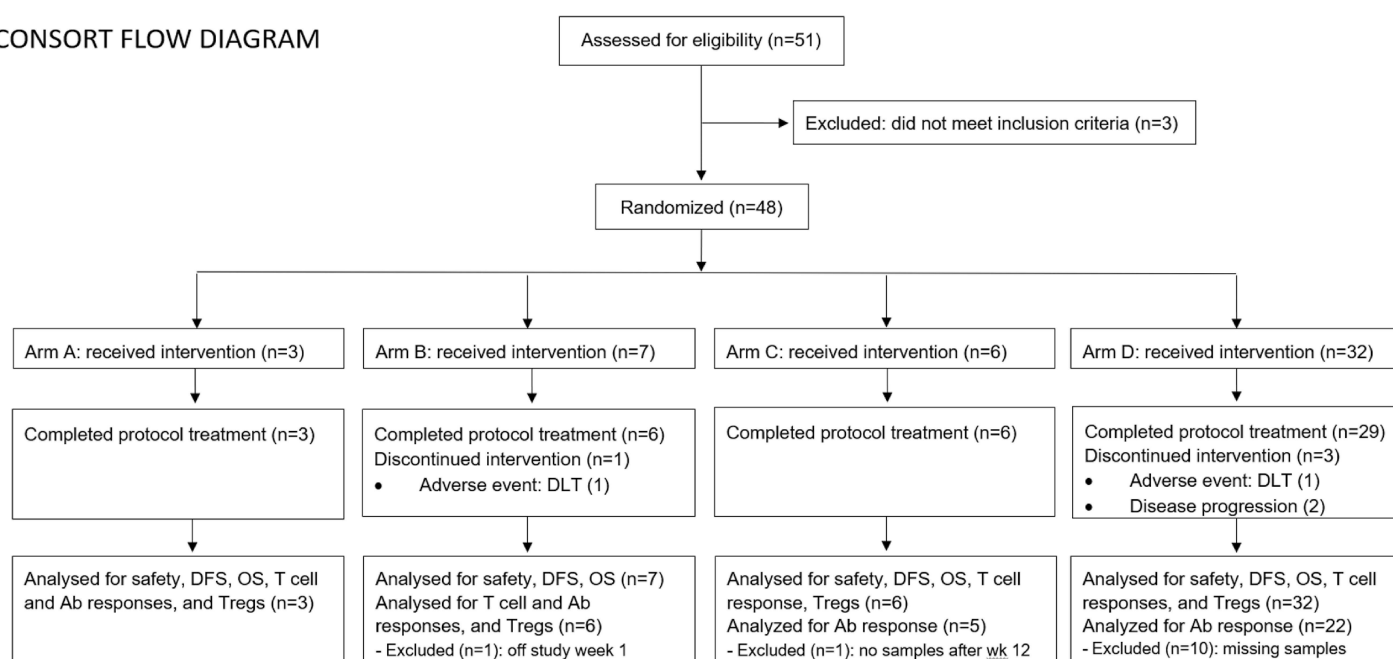

Supplement: jitc-2020-000934supp003_data_supplement.pdf [file jitc-2020-000934supp003_data_supplement.pdf]
